# Supplementary material
Source: publisher figshare collection journal article supplement (https://rs.figshare.com/ndownloader/files/24529913)
Supplement: Supplementary file 1 [file 24529913]

Table S6. Predictors influencing Ruffed Grouse over-winter survival. Predictors shown are from the top models from three rounds (low, median, and high) of a sensitivity analysis to explore the effects of uncertainty in random slope estimation (Table S4). Predictors in all three top models were: SSE>15M = mean probability of selection between 15 cm and the population-level maximum available snow depth (i.e., personality in selection of deep snow; obtained from a resource selection function) and SEXP<15 = the median snow depth at an individual’s used roost sites for snow depths < 15 cm. *β* = beta estimate, SE = standard error, 95% CI = 95% confidence interval.

| Round | Predictors | *β* | SE | 95% CI |
| --- | --- | --- | --- | --- |
| Low | Intercept | 1.76 | 0.57 | 0.64, 2.88 |
|  | SSE>15M | 0.66 | 0.42 | -0.17, 1.49 |
|  | SEXP<15 | -1.98 | 0.62 | -3.21, -0.76 |
|  |  |  |  |  |
| Median | Intercept | 1.78 | 0.57 | 0.66, 2.90 |
|  |  |  |  |  |
|  | SSE>15M | 0.70 | 0.43 | -0.14, 1.55 |
|  |  |  |  |  |
|  | SEXP<15 | -1.99 | 0.62 | -3.21, -0.77 |
|  |  |  |  |  |
| High | Intercept | 1.80 | 0.57 | 0.67, 2.93 |
|  |  |  |  |  |
|  | SSE>15M | 0.71 | 0.44 | -0.15, 1.56 |
|  |  |  |  |  |
|  | SEXP<15 | -2.01 | 0.67 | -3.23, -0.78 |
